# Supplementary material for: Dendritic nanospace constructed by only glycerol units enhanced uptake of a fluorescent molecule in aqueous solution
Source: Royal Society of Chemistry journal article supplement (doi:10.1039/c1cc15949f), 2011-11-09
Supplement: c1cc15949f.pdf [file c1cc15949f.pdf]

## Electronic Supplementary Information

### Dendritic Nanospace Constructed by Only Glycerol Units Enhanced Uptakes of a Fluorescent Molecule in Aqueous Solution

Haejoo Lee and Tooru Ooya\*

Graduate School of Engineering, Kobe University, 1-1 Rokkodai-cho, Nada-ku, Kobe 657-8501, Japan

Fax: +81 78 803 6255; Tel: 81 78 803 6255; E-mail: ooya@gold.kobe-u.ac.jp

#### Experimental Methods

##### Materials

Allyl chloride, 4-methylmorpholine *N*-oxide (NMO), and 50 wt % of sodium hydroxide solution were purchased from Sigma-Aldrich Co. (St. Louis, USA) and used without further purification. Tetrabutylammonium bromide (TBAB) and aqueous (4 wt%) osmium tetroxide solution were purchased from Tokyo Chemical Industry Co. (Tokyo, Japan). 1,1,1-Tris(hydroxymethyl)propane, 4-amino-3-hydroxynaphthalene-1-sulphonic acid (AHSA), sodium hydroxide and magnesium sulfate were purchased from Wako Pure Chemical Industries (Osaka, Japan) and were used without further purification. *t*-Butyl alcohol (*t*-BuOH), acetone, ethyl acetate, toluene and methanol were reagent grade and purchased from Nacalai Tesque (Kyoto, Japan). Petroleum ether was reagent grade and purchased from Kanto Chemical Co. Inc. (Tokyo, Japan).

##### Synthesis and purification of PGD-G1 and G2

PGD-G1 and G2 were synthesized by two-step process based on allylation of alcohols and catalytic dihydroxylation. For preparation of PGD-G1, allylchloride (0.5 mol) was added to a solution of

1,1,1-tris(hydroxymethyl)propane (THMP) (0.1 mol alcohol equiv.), tetrabutylammonium bromide (0.01 mol) and 50 % sodium hydroxide solution (0.5 mol) in a three-necked round-bottom flask, over 22 h at 45 °C with mixing using a overhead stirrer. When the reaction reached completion, 100 mL of toluene was added to the flask. The organic phase was separated, dried with MgSO<sub>4</sub>, filtered, and concentrated under vacuum. The allylated THMP was purified by silica gel column chromatography (eluent: petrolether/ethylacetate). The allylated THMP (0.1 mol equiv.) and *N*-methylmorpholine-*N*-oxide (0.11 mol) were dissolved in acetone (50 mL), distilled water (50 mL) and *t*-butanol (10 mL), and then 4 wt% OsO<sub>4</sub> solution in water (2 mL) was added to the mixture and stirred for 24 h at 25 °C. When the reaction was over, the volatile compounds were removed *in vacuo*. The obtained crude PGD-G1 (9.5 g) dissolved in methanol (10 mL) was applied to an acidic active alumina column (eluent: methanol/water), and the recovered crude product was then applied to silica gel chromatography (eluent: ethyl acetate/methanol), giving PGD-G1 as sticky substance with light brown color. In a similar manner, PGD-G2 was synthesized by using PGD-G1 as a starting material. The obtained PGD-G1 and G2 were identified by <sup>1</sup>H-NMR measurements using a 500 Hz FT-NMR apparatus (Bruker Advanced 500 spectrometer) and a MALDI-TOF-MS apparatus (Voyager 2000, AB SCIEX).

PGD-G1 : Yield: 84 %

<sup>1</sup>H NMR (D<sub>2</sub>O, 500 MHz): δ = 3.77 (m, 3H, HOCH<sub>2</sub>CH<sub>2</sub>-), 3.55-3.50 (dd, 4H, -OCH<sub>2</sub>CH-), 3.45-3.40 (m, 6H, HOCH<sub>2</sub>CH-), 3.39-3.34 (m, 2H, -OCH<sub>2</sub>CHOH), 3.30 (q, 4H, -CCH<sub>2</sub>O-), 3.22 (s, 2H, -CCH<sub>2</sub>O-), 1.24 (q, 2H, -CCH<sub>2</sub>CH<sub>3</sub>), 0.73 (t, 3H, -CCH<sub>2</sub>CH<sub>3</sub>)

MALDI-TOF-MS (matrix: CHCA) m/z = 379.16 (PGD-G1 + Na<sup>+</sup>)

PGD-G2 : Yield: 85 %

<sup>1</sup>H NMR (D<sub>2</sub>O, 500 MHz): δ = 3.76 (m, 6H, HOCH<sub>2</sub>CH<sub>2</sub>O-), 3.68 (m, 3H, -OCH<sub>2</sub>CH<sub>2</sub>O-), 3.64-3.53 (m, 12H, HOCH<sub>2</sub>CH<sub>2</sub>O-), 3.53-3.48 (m, 12H, HOCH<sub>2</sub>CH-), 3.48-3.38 (m, 12H, -OCH<sub>2</sub>CHO-), 3.29 (q, 4H, -CCH<sub>2</sub>O-), 3.22 (s, 2H, -CCH<sub>2</sub>O-), 1.25 (q, 2H, -CCH<sub>2</sub>CH<sub>3</sub>), 0.74 (t, 3H, -CCH<sub>2</sub>CH<sub>3</sub>)

MALDI-TOF-MS (matrix: CHCA) m/z = 823.12 (PGD-G2 + Na<sup>+</sup>)

#### Fluorescent measurements of AHSA in the presence of various concentration of PGDs

AHSA (3 mg, 13  $\mu\text{mol}$ ) was dissolved in 100 mL of 10 mM acetate buffer (pH 5.0) as a stock solution. PGD-G2 (2, 4, 9, 18, 35, 70  $\mu\text{mol}$ ) was dissolved in 1 mL of 10 mM acetate buffer (pH 5.0). The stock solution of AHSA (30  $\mu\text{L}$ ) was added to each PGD-G2 solution (final concentration; AHSA: 0.4  $\mu\text{M}$ , PGD-G2: 2, 4, 8, 16, 31, 64  $\mu\text{M}$ ). The mixture of AHSA and PGD-G2 was incubated for 30 min at 4°C in a quartz cell, and emission spectra of the solution were measured (excitation wavelength: 342 nm) by a spectrofluorometer (F-2500, HITACHI, Ltd., Japan) at 4°C under nitrogen atmosphere. The same experiments were performed using PGD-G1 instead of PGD-G2. Glycerol was used as a control sample of PGDs.

#### $^1\text{H}$ -NMR titration of AHSA toward PGDs

PGD-G2 or -G1 was dissolved in 10 mM acetate buffer prepared by  $\text{D}_2\text{O}$ , pD of which was adjusted by NaOD and acetic acid- $d_4$  (concentration: 7.37 mM). AHSA dissolved in the buffer was added to the PGD-dissolved solution to be 4.93, 9.87, 19.7 and 49.3 mM (final concentration of AHSA: 49.3 mM).  $^1\text{H}$ -NMR spectra of each solution were measured using a 500 Hz FT-NMR apparatus (Bruker Advanced 500).

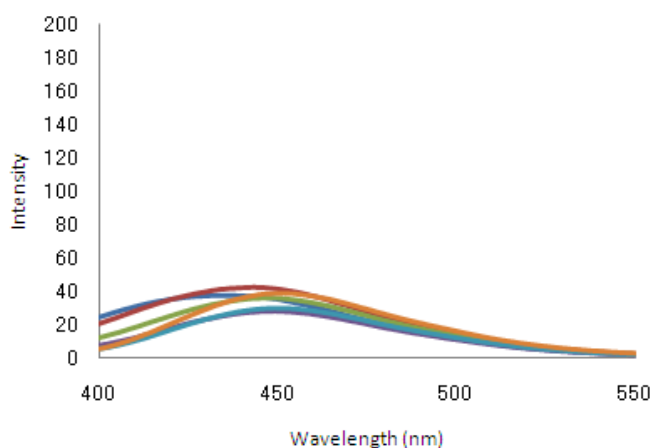

**Fig. S1** Fluorescent spectral change for a solution of AHSA (0.4 μM) on the addition of PGD-G1 in 10 mM acetate buffer (pH 5.0) at 4 °C: PGD-G1 concentration = 4, 9, 18, 35, 70, 140 μM (from bottom to top).

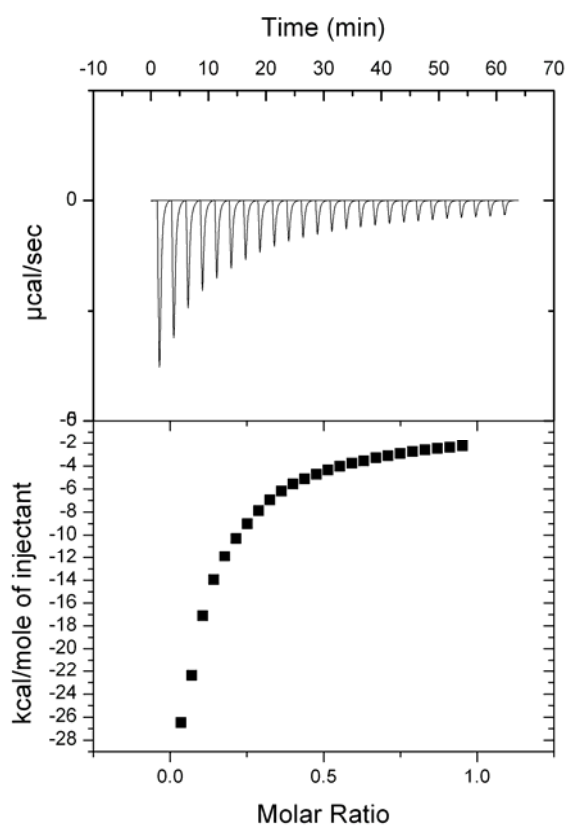

**Fig. S2** ITC titration curves for PGD-G1 and AHSA in water. ITC measurements were performed to establish solution binding constants. In this experiment, a solution of PGD-G1 (0.1 mM) was titrated with a solution of AHSA (total volume: 0.5 mM).
